# Supplementary material
Source: PubMed Central journal article supplement (PMC2797144)
Supplement: supp_M109.048439_jbc.M109.048439-1.pdf [file supp_M109.048439_jbc.M109.048439-1.pdf]

**NON-REDUNDANT ROLES OF PHOSPHOINOSITIDE 3-KINASE ISOFORMS  $\alpha$   
AND  $\beta$  IN GLYCOPROTEIN VI-INDUCED PLATELET SIGNALING AND  
THROMBUS FORMATION\***

**Karen Gilio<sup>1†</sup>, Imke C. A. Munnix<sup>1†</sup>, Pierre Mangin<sup>2</sup>, Judith M. E. M. Cosemans<sup>1</sup>, Marion A. H. Feijge<sup>1</sup>, Paola E. J. van der Meijden<sup>1</sup>, Servé Olieslagers<sup>3</sup>, Magdalena B. Chrzanowska-Wodnicka<sup>4</sup>, Rivka Lillian<sup>2</sup>, Simone Schoenwaelder<sup>2</sup>, Shigeo Koyasu<sup>5</sup>, Stewart O. Sage<sup>6</sup>, Shaun P. Jackson<sup>2</sup> and Johan W. M. Heemskerk<sup>1</sup>**

From the Departments of <sup>1</sup>Biochemistry and <sup>3</sup>Cardiology, Cardiovascular Research Institute Maastricht (CARIM), University of Maastricht, The Netherlands; <sup>2</sup>Australian Centre for Blood Diseases, Monash University, Alfred Medical Research Centre and Education Precinct (AMREP), Melbourne, Victoria, Australia 3004; <sup>4</sup>Blood Research Institute, Wisconsin, Milwaukee WI, USA; <sup>5</sup>Department of Microbiology and Immunology, Keio University School of Medicine, Tokyo, Japan; <sup>6</sup>Department of Physiology, Development & Neuroscience, University of Cambridge, Cambridge, CB2 3EG, United Kingdom.

Running head: PI3K isoforms in glycoprotein VI-induced platelet activation

<sup>†</sup>These authors contributed equally.

Address correspondence to: J.W.M. Heemskerk, Dept. of Biochemistry, CARIM, University of Maastricht, P.O. Box 616, 6200 MD Maastricht, The Netherlands; Tel.: 31-43-3881671; Fax: 31-43-388-4160; E-mail [jwm.heemskerk@bioch.unimaas.nl](mailto:jwm.heemskerk@bioch.unimaas.nl).

**Supplementary data**

**SUPPLEMENTARY TABLE I**

Inhibition of PI3K lipid kinase activity for purified enzymes *in vitro*. Listed are IC<sub>50</sub> values for the indicated compounds, regarding inhibition of the catalytic activity of recombinant class I PI3K isoforms in cell-free system. Data were drawn from appropriate patent and publication information, see Refs. (31,41).

| Compound   | Relative specificity | IC <sub>50</sub> (μM) |         |          |          |
|------------|----------------------|-----------------------|---------|----------|----------|
|            |                      | $\alpha$              | $\beta$ | $\gamma$ | $\delta$ |
| PIK-112    | none                 | >100                  | >100    | >100     | >100     |
| PIK-75     | $\alpha$             | 0.008                 | 0.34    | 0.9      | >20      |
| PI-103     | $\alpha/\beta$       | 0.004                 | 0.018   | >500     | >20      |
| YM-024     | $\alpha/\delta$      | 0.30                  | 2.65    | 9.1      | 0.33     |
| TGX-221    | $\beta$              | 7.0                   | 0.008   | 3.5      | 0.2      |
| AS-252424  | $\gamma$             | 1.1                   | >20     | 0.035    | >20      |
| IC-87114   | $\delta$             | >100                  | 75      | 29       | 0.1      |
| LY-294002  | $\alpha-\delta$      | 0.50                  | 1.0     | n.d.     | 0.57     |
| Wortmannin | $\alpha-\delta$      | 0.001                 | 0.003   | n.d.     | 0.001    |

## A Thrombin

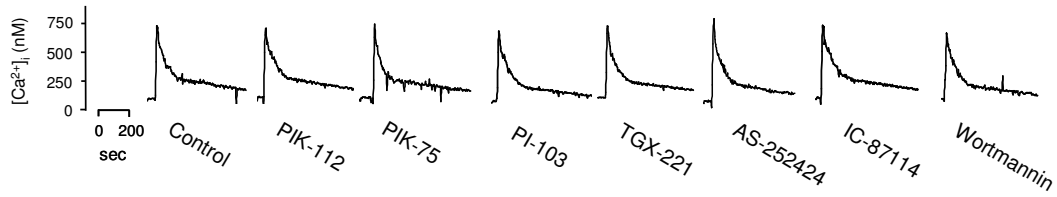

## B

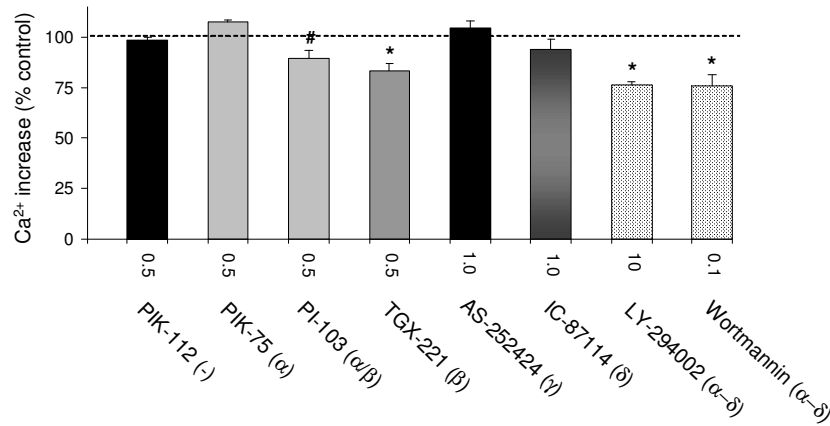

Supplementary fig. 1. **Inhibition of platelet PI3K isoforms moderately affects thrombin receptor-induced Ca<sup>2+</sup> responses.** Human Fura-2-loaded platelets were treated with aspirin, preincubated with ADP receptor blockers, and treated with PI3K inhibitor, as described for Fig. 2. Shown are Ca<sup>2+</sup> responses upon stimulation with thrombin (10 nM). A. Representative [Ca<sup>2+</sup>]<sub>i</sub> traces; B. inhibitor effects expressed as percentages of time-[Ca<sup>2+</sup>]<sub>i</sub> integrals relative to the control condition. Note that at a low dose of thrombin (1 nM), PIK-75, TGX-221 or the combination of both (0.5 μM) suppressed the Ca<sup>2+</sup> rise to 107±3%, 87±2% or 101±5% of control, respectively. Data are means ± S.E. (n=3-5); \*p<0.05 compared to control.

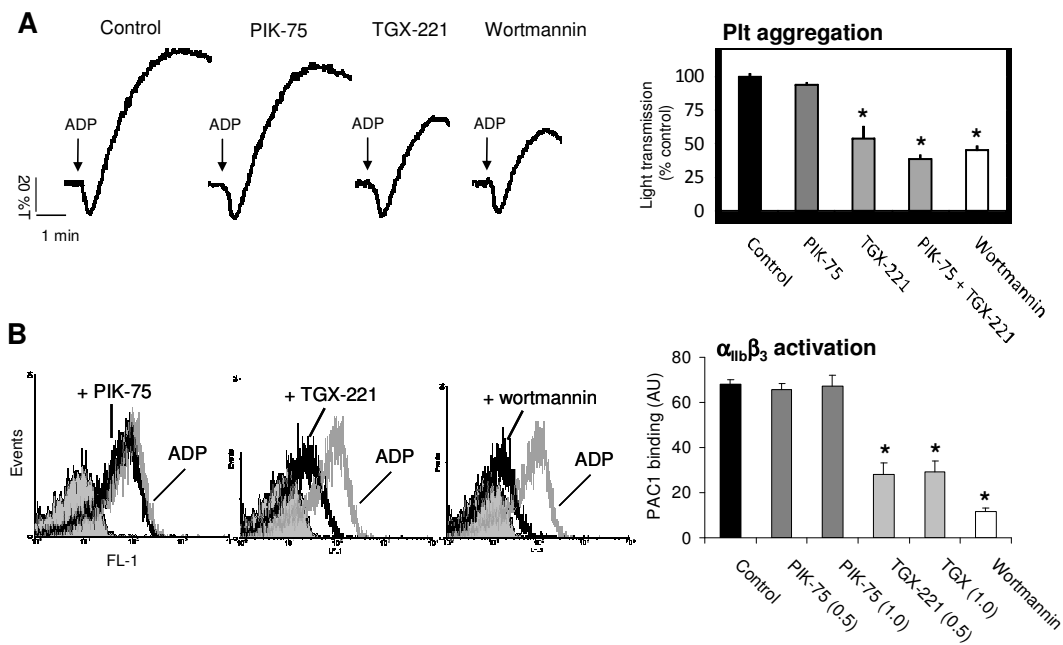

**Supplementary fig. 2. Specificity of PI3K $\beta$  inhibitor TGX-221 for affecting ADP-induced platelet activation.** Human PRP was preincubated with Me<sub>2</sub>SO vehicle (control), TGX-221 (0.5-1  $\mu$ M), PIK-75 (0.5-1  $\mu$ M) or wortmannin (1  $\mu$ M), prior to stimulation with ADP. **A.** Representative light transmission aggregation traces induced by 5  $\mu$ M ADP, and quantitative effect of inhibitors on ADP-induced platelet aggregation. **B.** Binding of FITC-PAC1 to platelets stimulated with 20  $\mu$ M ADP (10 min). Fluorescence histograms are shown of unstimulated platelets (filled grey), vehicle controls (grey lines) and samples containing indicated inhibitor (black overlays). Means  $\pm$  S.E. ( $n=4$ ); \* $p<0.05$  compared to control.
